# Supplementary material
Source: Springer Nature journal article supplement (https://www.springermedizin.de/resource/supplementary/12874_2011_650_MOESM8_ESM.pdf/9432324)

(a)

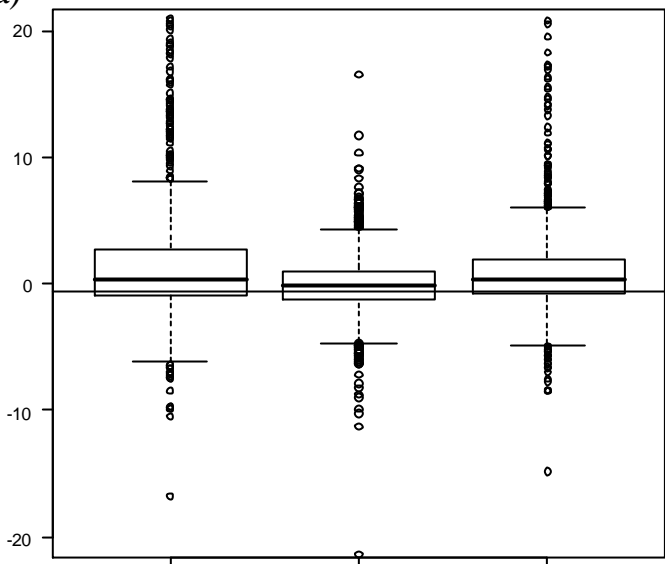

(b)

Mean time - mean time (IPD)

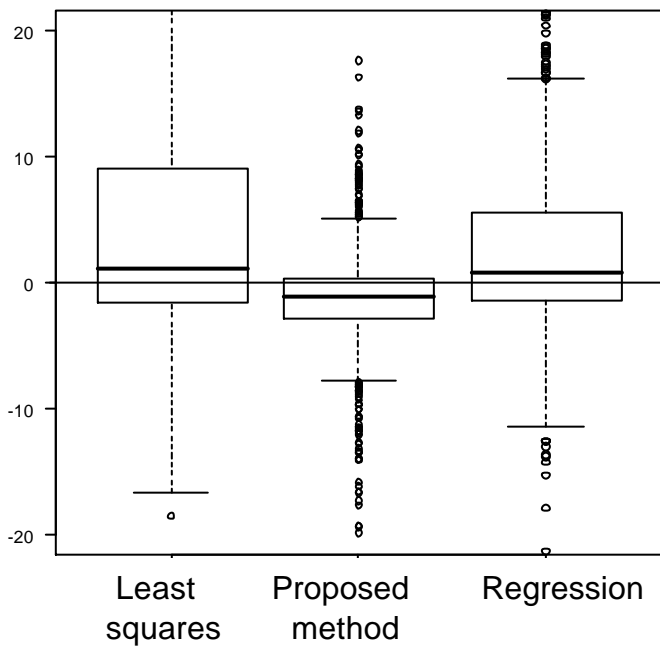

Supplement: MOESM8 [file 9432324]
